# Supplementary material
Source: MDPI journal article supplement (https://www.mdpi.com/search?q=pharmaceutics-12-00039)
Supplement: s001 [file pharmaceutics-12-00039-s001.pdf]

# Supplementary Materials: Amphiphilic Polypeptides for VEGF siRNA Delivery into Retinal Epithelial Cells

Olga Osipova, Vladimir Sharoyko, Natalia Zashikhina, Natalya Zakharova, Tatiana Tennikova, Arto Urtti and Evgenia Korzhikova-Vlakh

## 1. Polymer Characterization

### 1.1. Static and Dynamic Light Scattering of Polymer Solutions

**Table S1.** Data of static (SLS) and dynamic (DLS) light scattering of polymer solutions (DMSO).

| Sample * | $dn/dc$ ,<br>$\text{cm}^3/\text{g}$ | SLS   |                                                               | DLS            |
|----------|-------------------------------------|-------|---------------------------------------------------------------|----------------|
|          |                                     | $M_w$ | $A_2$ ,<br>$\text{cm}^3 \cdot \text{mol} \cdot \text{g}^{-2}$ | $R_{h-D}$ , nm |
| KEF1     | 0.0542                              | 23000 | $-5.45 \times 10^{-3}$                                        | 2.2            |
| KEF2     | 0.0513                              | 17500 | $-2.04 \times 10^{-3}$                                        | 2.2            |
| KEF3     | 0.0574                              | 17400 | $-1.75 \times 10^{-3}$                                        | 2.2            |
| KEI1     | 0.0537                              | 18800 | $-2.69 \times 10^{-3}$                                        | 1.0            |
| KEI2     | 0.0608                              | 17100 | $-2.13 \times 10^{-3}$                                        | 1.4            |

\* Polymers used in protected forms as P(Lys(Z)-co-Glu(OBzl)-co-Phe) and P(Lys(Z)-co-Glu(OBzl)-co-Ile).

### 1.2. $^1\text{H}$ NMR Spectroscopy

*Poly(L-lysine-co-L-glutamic acid-co-L-isoleucine)*

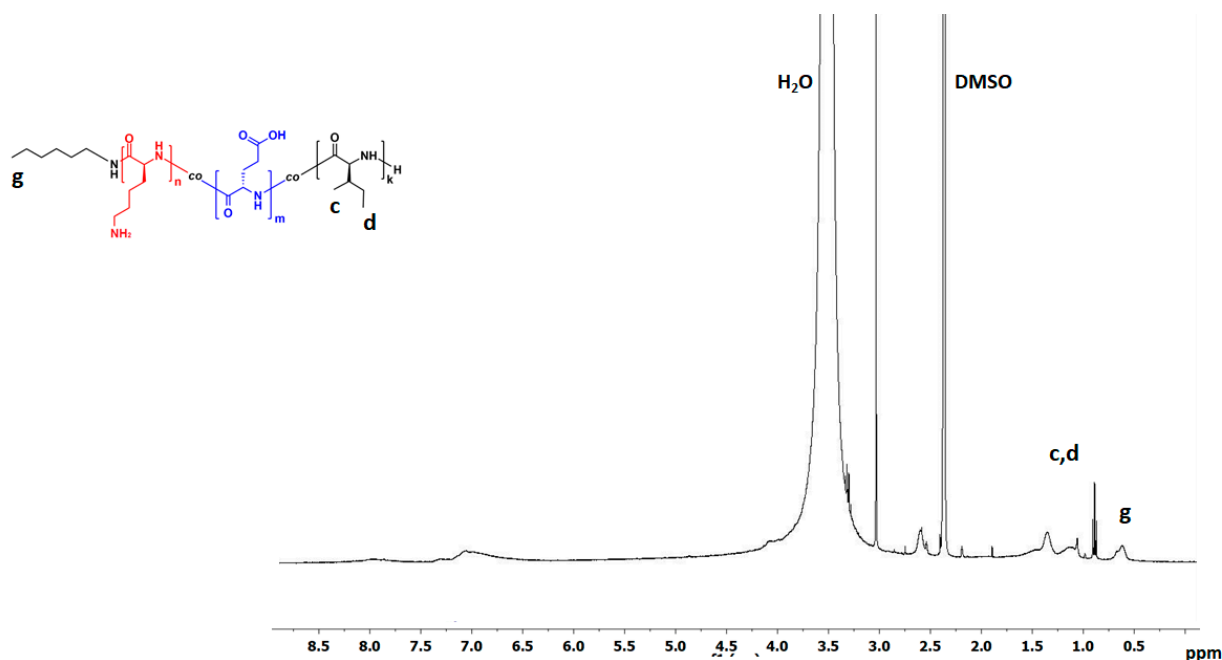

**Figure S1.**  $^1\text{H}$ NMR spectrum of deprotected sample KEI1.

*Poly(L-ε-carboxybenzyl-lysine-co-L-γ-benzyl-glutamic acid-co-L-phenylalanine)*

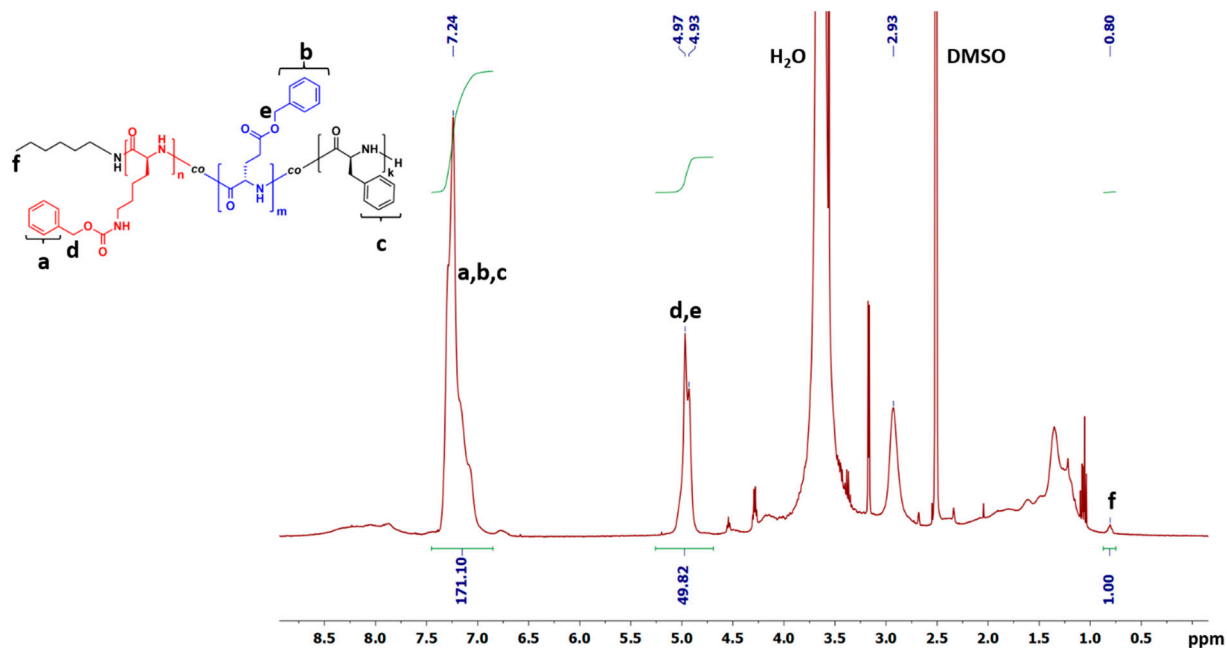

**Figure S2.** <sup>1</sup>H NMR spectrum of protected sample KEF1.

Polymer composition calculation was carried out using following equations:

[*Phe*], %

$$= \left( \frac{I(Lys(Z))_{6.9-7.4 \text{ ppm}} + I(Glu(OBzl))_{6.9-7.4 \text{ ppm}} + I(P\Box e)_{6.9-7.4 \text{ ppm}}/5 - (I(Lys(Z))_{4.7-5.2 \text{ ppm}} + I(Glu(OBzl))_{4.7-5.2 \text{ ppm}})/2}{(I(Lys(Z))_{6.9-7.4 \text{ ppm}} + I(Glu(OBzl))_{6.9-7.4 \text{ ppm}} + I(P\Box e)_{6.9-7.4 \text{ ppm}})/5} \right) \times 100\% \quad (1)$$

where [*Phe*], % - molar fraction of *Phe* in the copolymer,  $I(Lys(Z))_{6.9-7.4 \text{ ppm}}$ ,  $I(Glu(OBzl))_{6.9-7.4 \text{ ppm}}$  and  $I(Phe)_{6.9-7.4 \text{ ppm}}$  are relative integral areas of 5 aromatic protons of *Phe*, *Z*- and *OBzl*-groups of polymer at 6.9–7.4 ppm,  $I(Lys(Z))_{4.7-5.2 \text{ ppm}}$  and  $I(Glu(OBzl))_{4.7-5.2 \text{ ppm}}$  are relative integral areas of 2 CH<sub>2</sub> protons of *Z*- and *OBzl*-groups of polymer at 4.7–5.2 ppm.

*Poly(L-ε-carboxybenzyl-lysine-co-L-γ-benzyl-glutamic acid-co-L-isoleucine)*

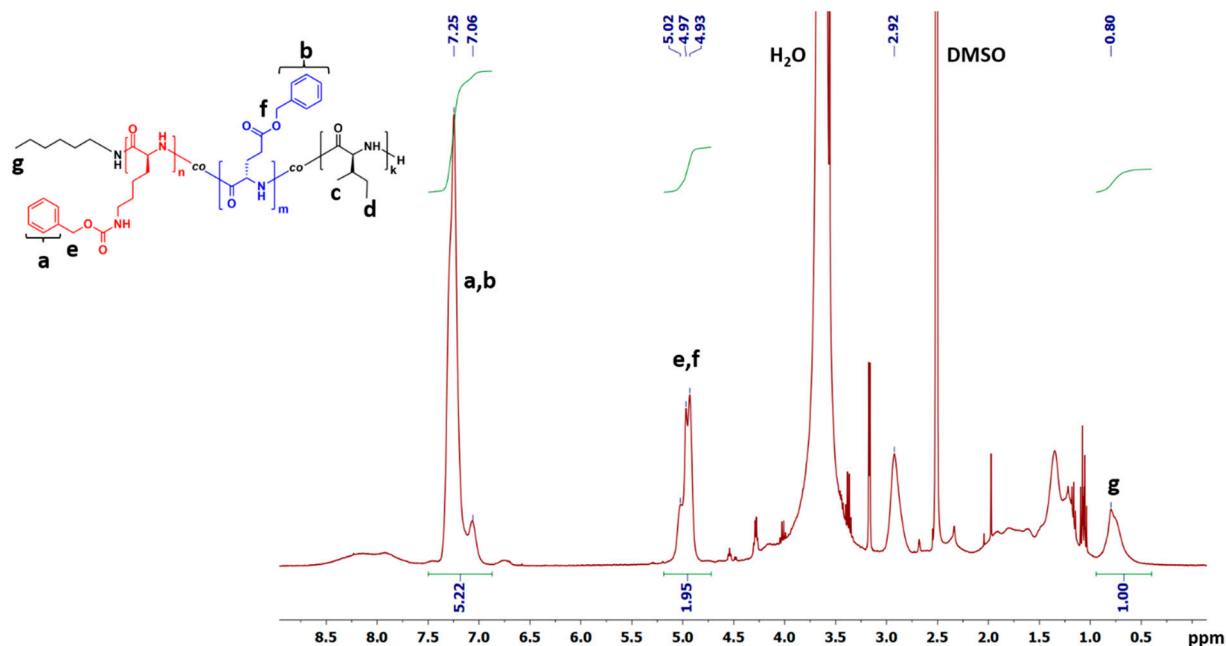

**Figure S3.**  $^1\text{H}$ NMR spectrum of protected sample KEI2.

Polymer composition calculation was carried out using following equations:

$$[\text{Ile}], \% = \left( \frac{I(\text{Ile})_{0.5-0.9 \text{ ppm}}/6}{I(\text{Lys}(Z))_{6.9-7.5 \text{ ppm}} + I(\text{Glu}(\text{OBzl}))_{6.9-7.5 \text{ ppm}}/5} \right) * 100\% \quad (5),$$

Where  $[\text{Ile}], \%$  - molar fraction of *Ile* in the copolymer,  $I(\text{Ile})_{0.5-0.9 \text{ ppm}}$  is relative integral area of 6  $\text{CH}_3$  protons of *Ile* at 0.5–0.9 ppm and  $I(\text{Lys}(Z))_{6.9-7.5 \text{ ppm}}$  and  $I(\text{Glu}(\text{OBzl}))_{6.9-7.5 \text{ ppm}}$  are relative integral areas of 5 aromatic protons of Z- and OBzl-groups of polymer at 6.9–7.5 ppm.

## 2. Determination of Critical Micelle Concentration

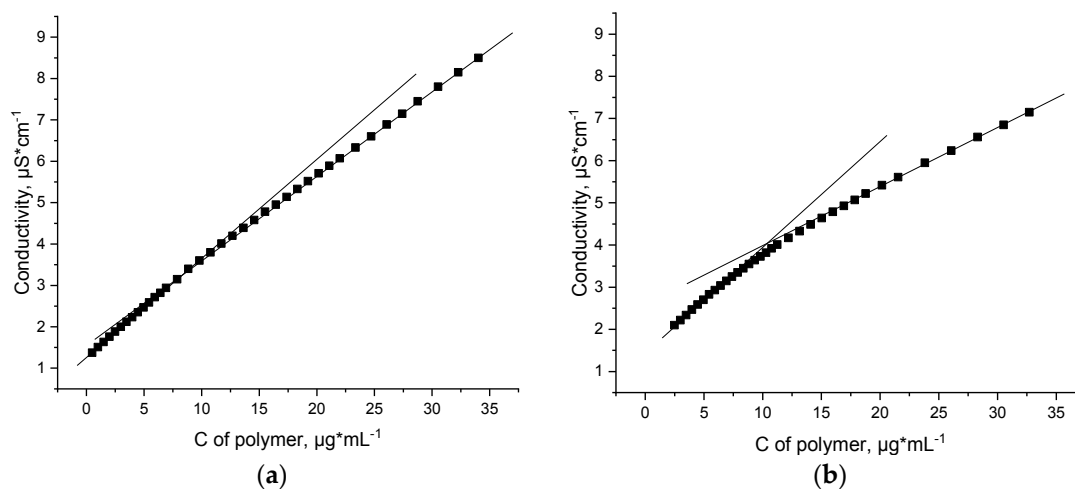

**Figure S4.** Dependences of conductivity on polymer concentration: (a) sample KEF1 and (b) sample KEI1.

### 3. Dynamic Light Scattering

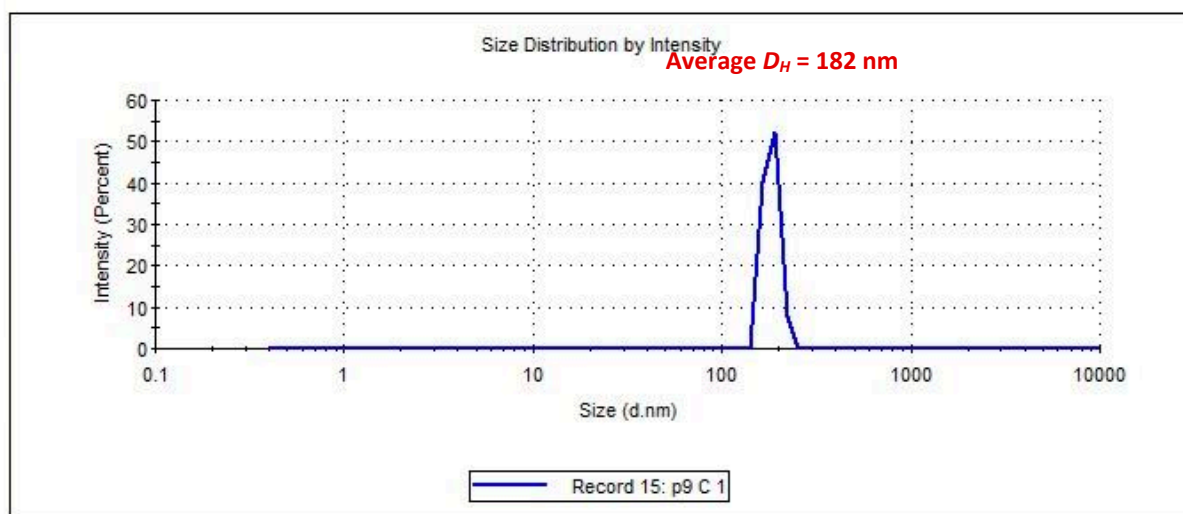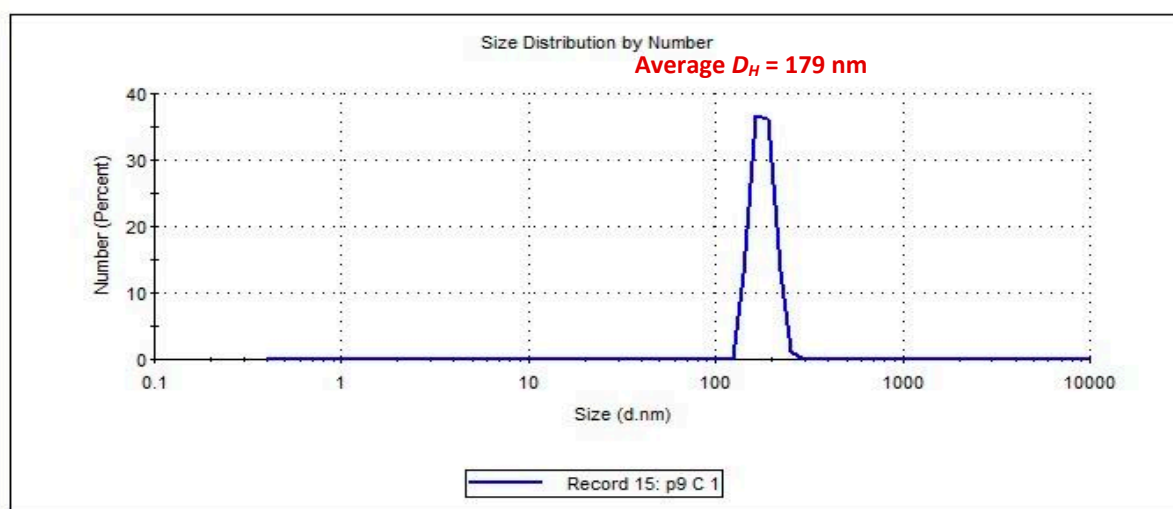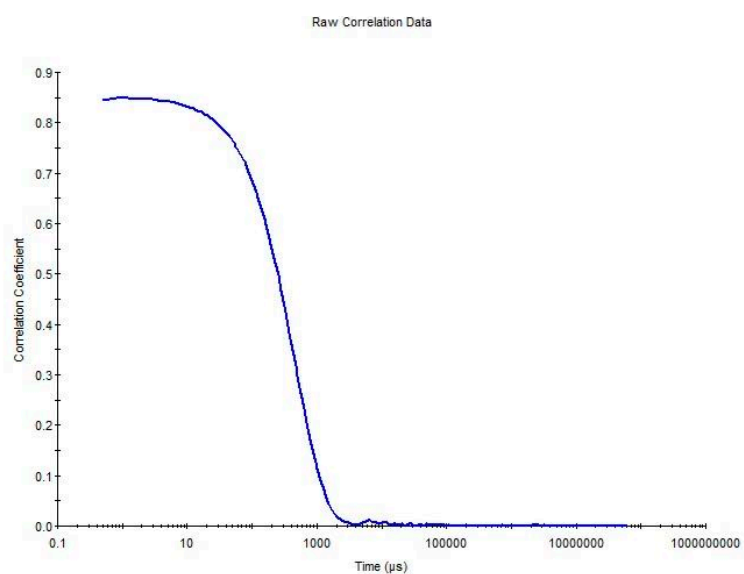

Figure S5. DLS analysis of polymer nanoparticles prepared from P(Lys-co-Glu-co-Ile), sample KEI2.

#### 4. Release of duplex oligo-dT-dA from polyplex with poly-L-lysine

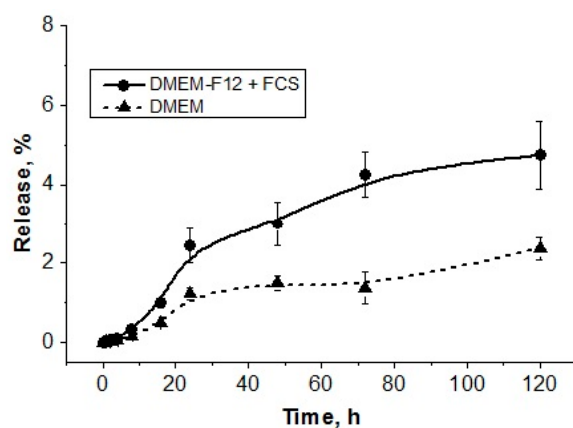

Figure S6. Release of duplex oligo-dT-dA from the complex with poly-L-lysine:oligonucleotide (ratio 4:1).

#### 5. Cytotoxicity of Nanoparticles

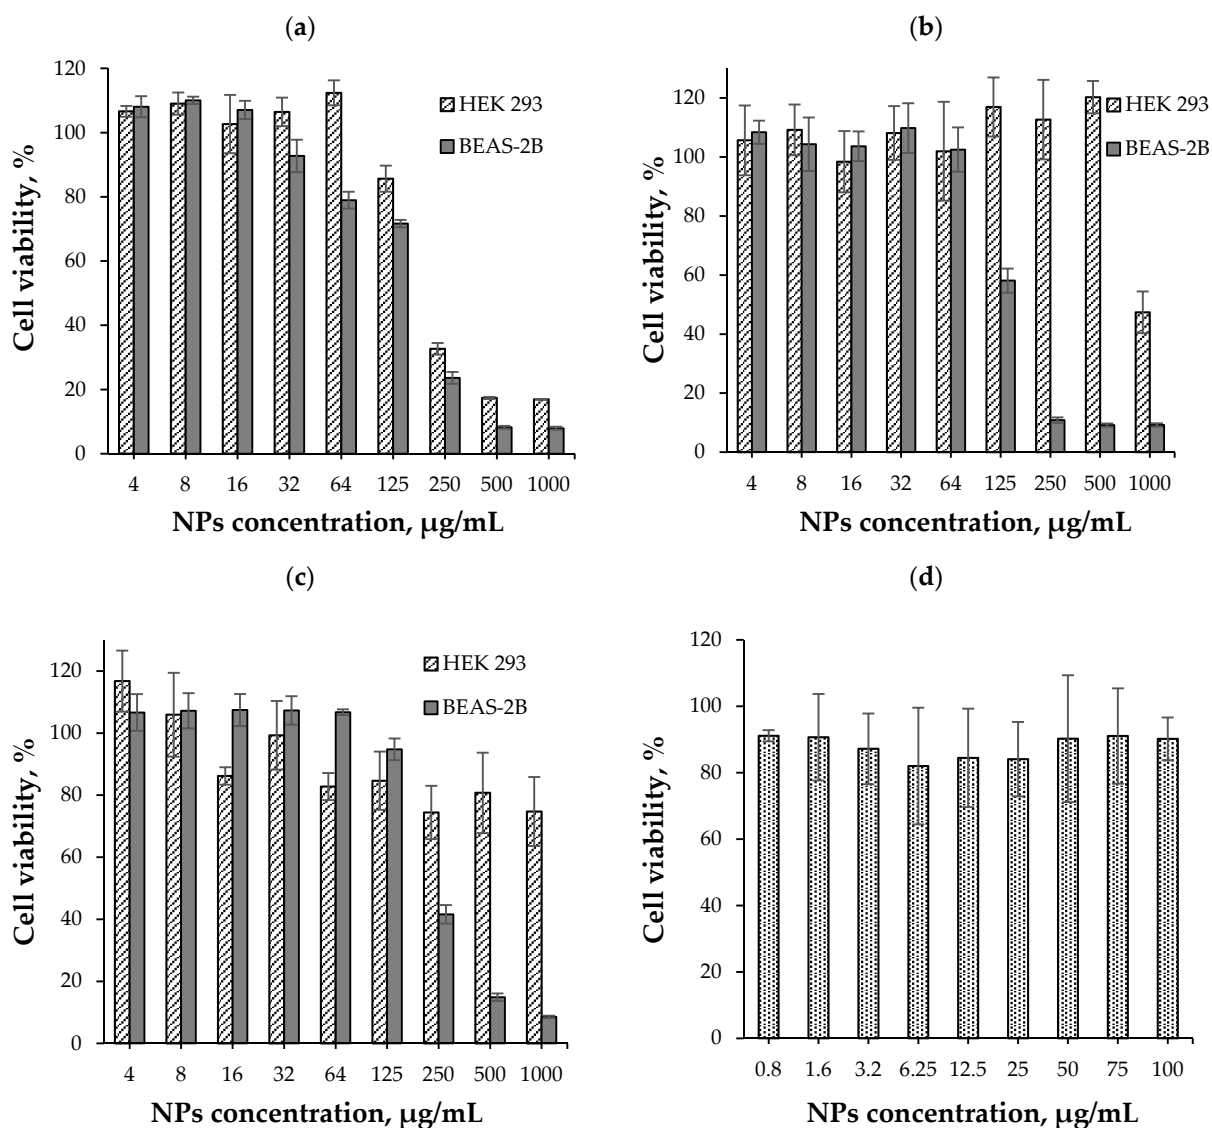

Figure S7. Nanoparticle's cytotoxicity in BEAS-2B and HEK-293 (a-c) and ARPE-19 cells (d) (24 h): (a) sample KEF1, (b) sample KEI1, (c) sample KEI2 and (d) sample KEI2.
